# Supplementary material
Source: MDPI journal article supplement (https://www.mdpi.com/2306-5338/9/5/79)
Supplement: s1 [file s1]

**Figure S1 Standardised precipitation index over different time periods ( 1, 3, 6, 12, 24 and 48 months) for Donji Miholjac meteorological station**

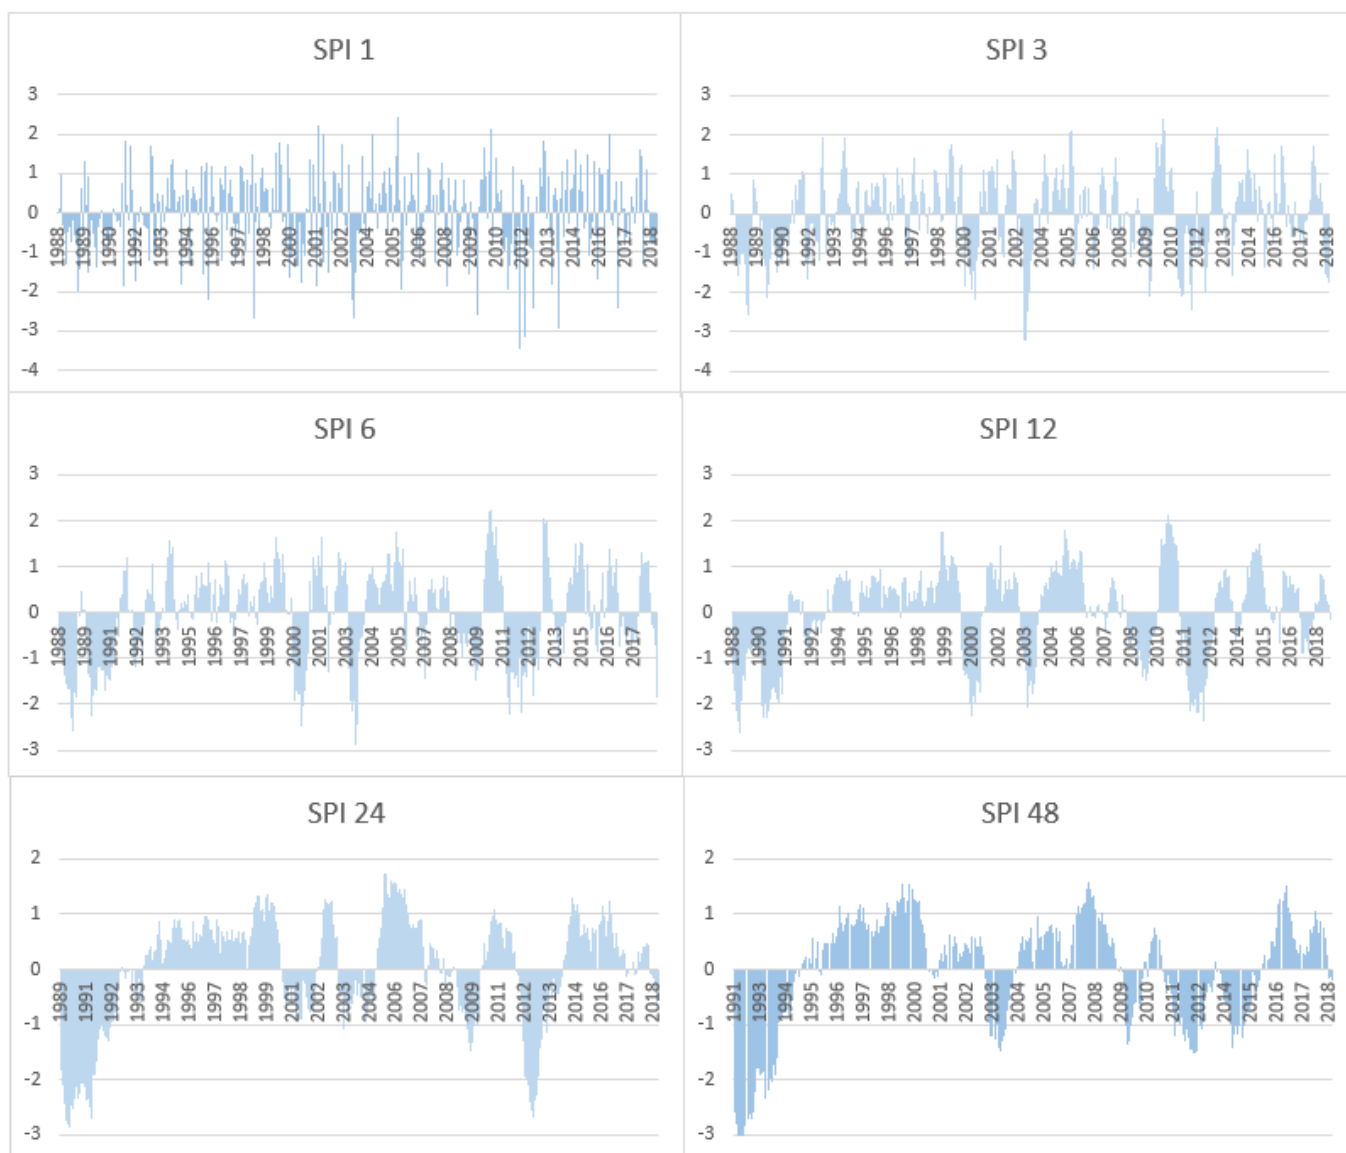

**Figure S2 Standardised precipitation evapotranspiration index over different time periods ( 1, 3, 6, 12, 24 and 48 months) for Donji Miholjac meteorological station**

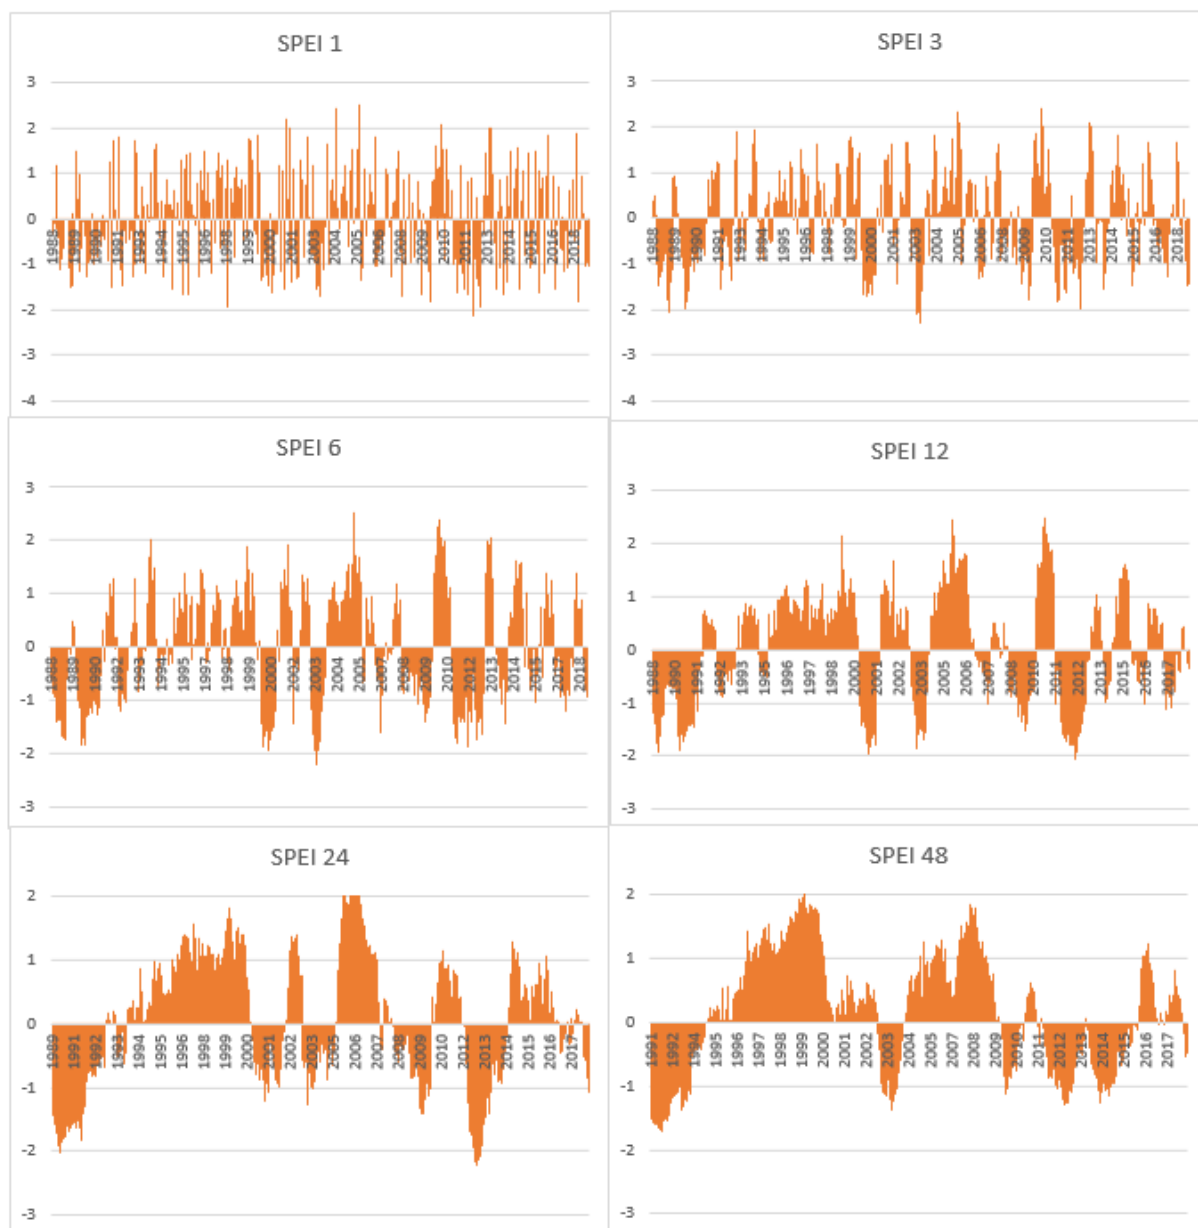

**Figure S3 Standardised GROUNDWATER index over different time periods ( 1, 3, 6, 12, 24 and 48 months) for P-58 observation well**

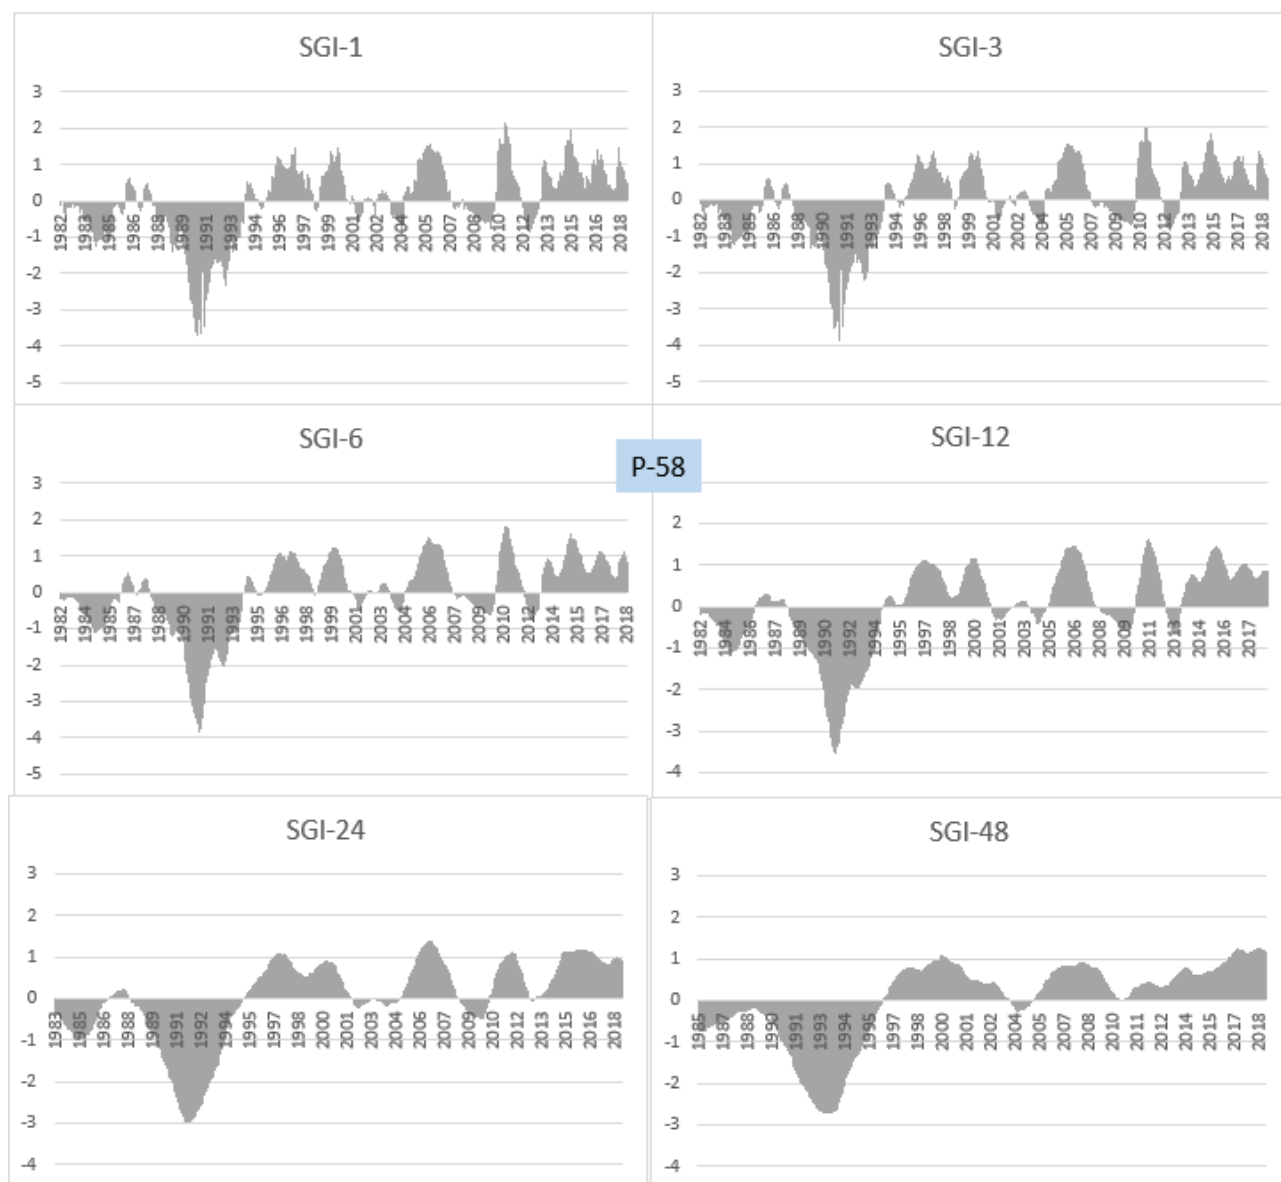

**Figure S4 Standardised GROUNDWATER index over different time periods ( 1, 3, 6, 12, 24 and 48 months) for P-18 observation well**

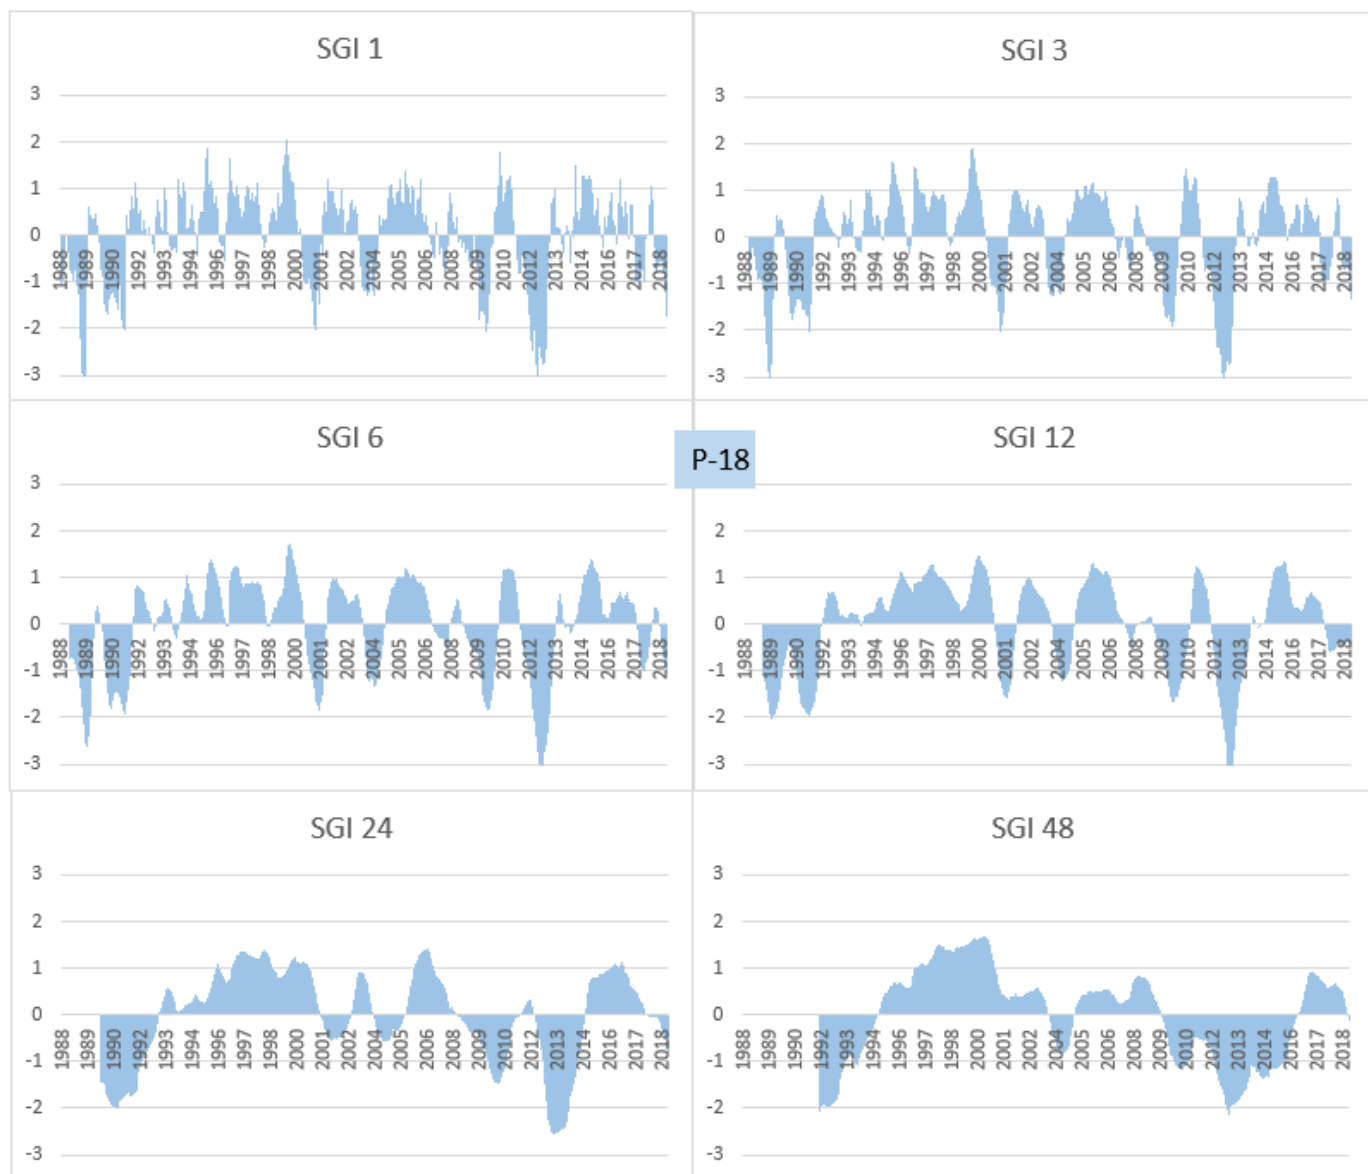

**Figure S5 Standardised GROUNDWATER index over different time periods ( 1, 3, 6, 12, 24 and 48 months) for P-23 observation well**

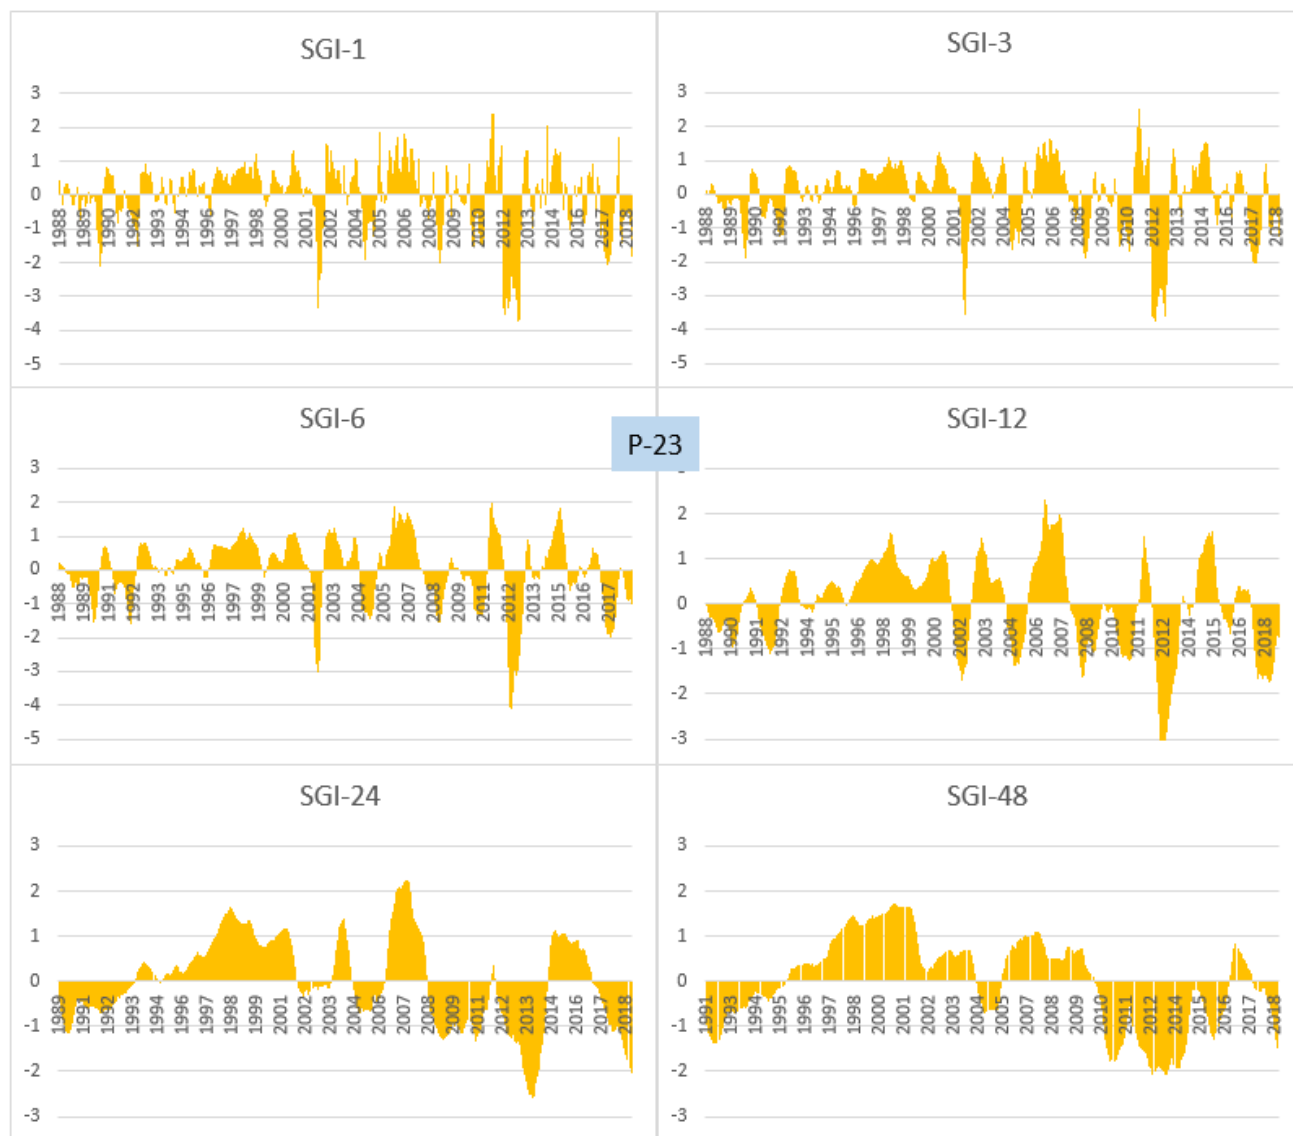

**Figure S6 Standardised GROUNDWATER index over different time periods ( 1, 3, 6, 12, 24 and 48 months) for P-6 observation well**

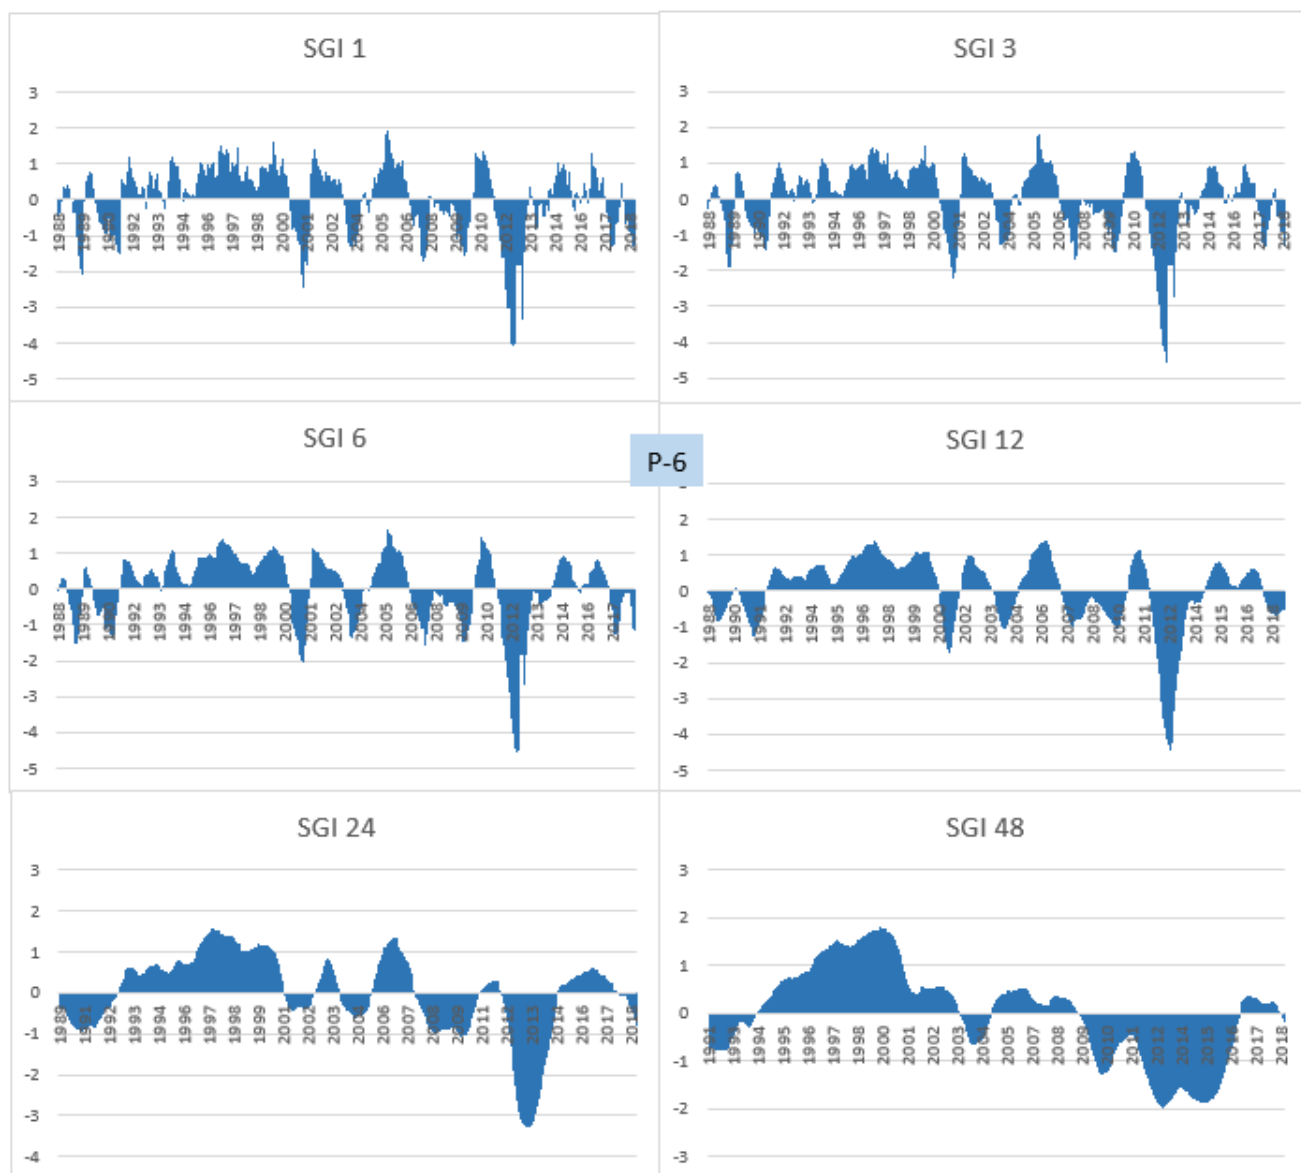

**Figure S7 Standardised GROUNDWATER index over different time periods ( 1, 3, 6, 12, 24 and 48 months) for P-9 observation well**

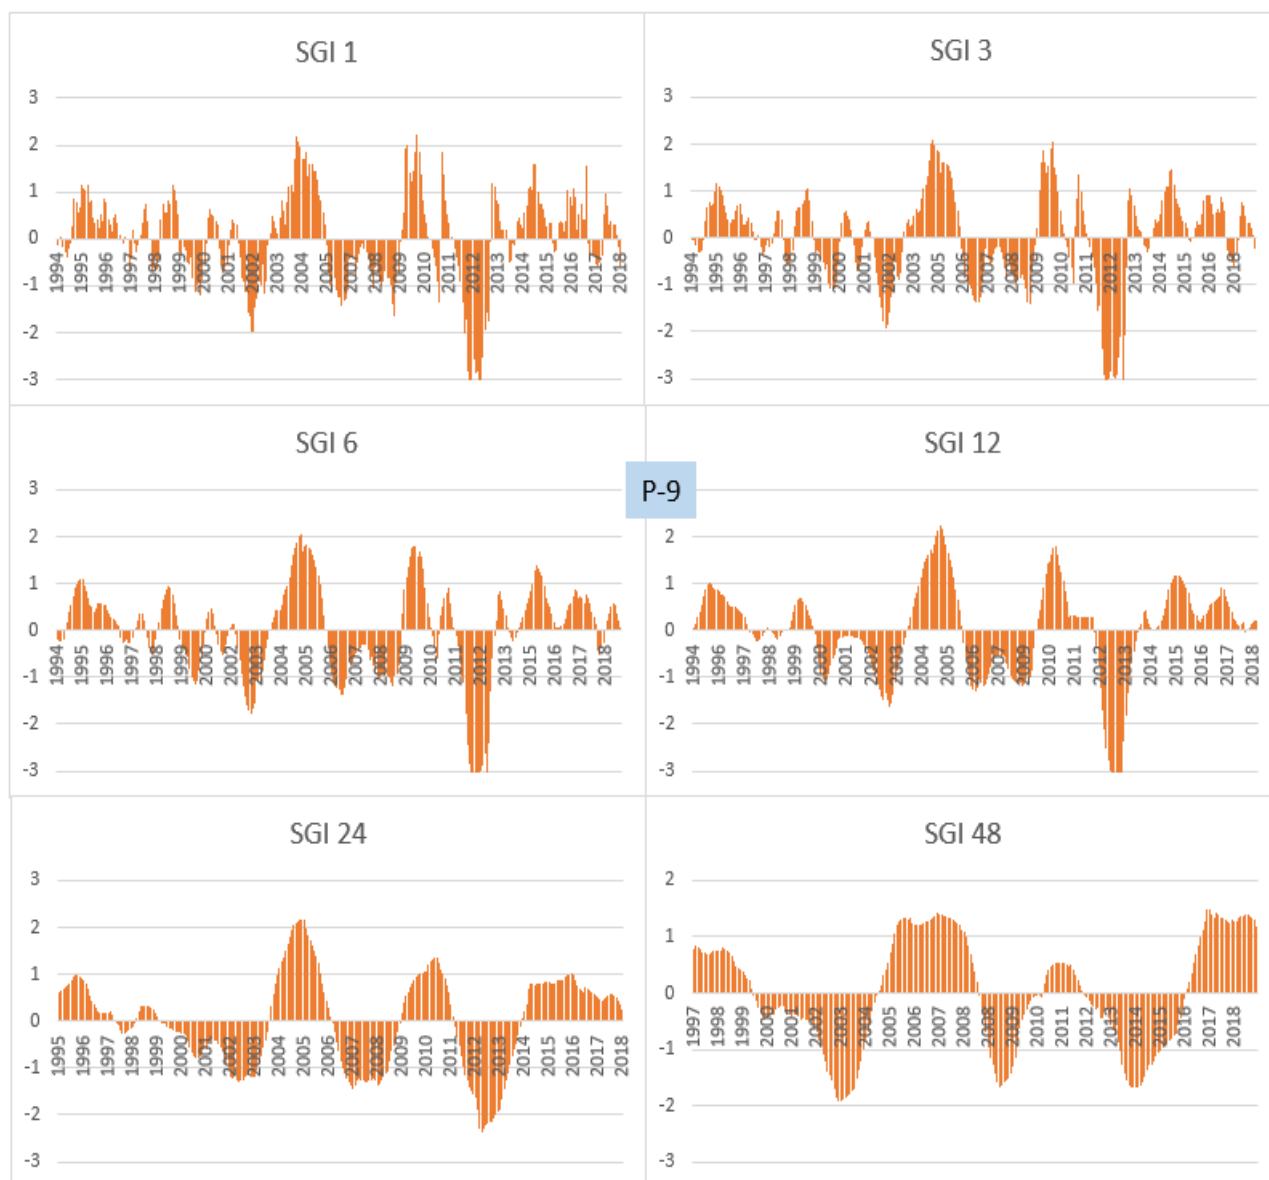

**Figure S8 Standardised GROUNDWATER index over different time periods ( 1, 3, 6, 12, 24 and 48 months) for P-17 observation well**

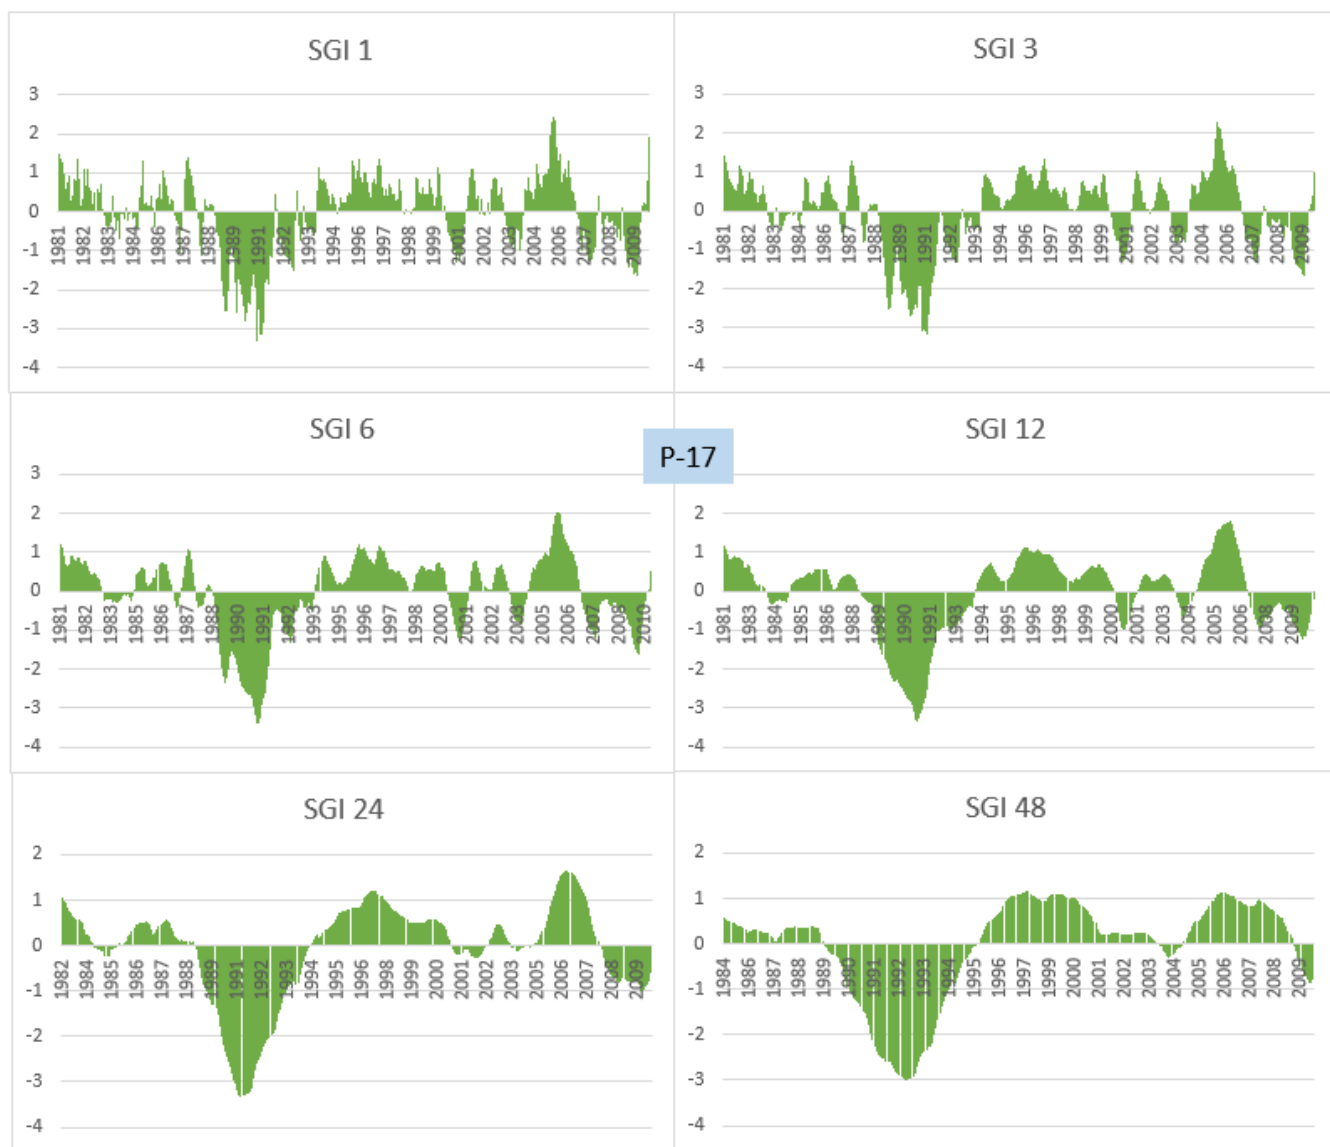



Figure S9 Correlation between SPI and SPEI in different time scales ( Našice meteorological station ).

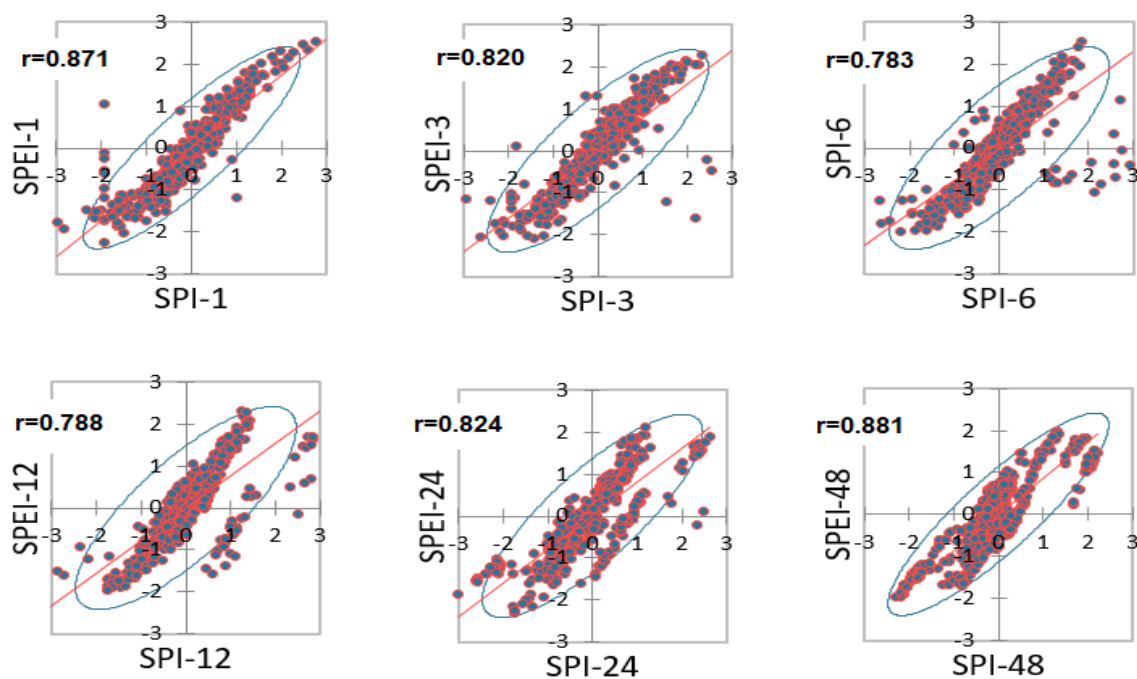

**Figure S10 Correlation between SPI and SPEI in different time scales ( Slatina meteorological station ).**

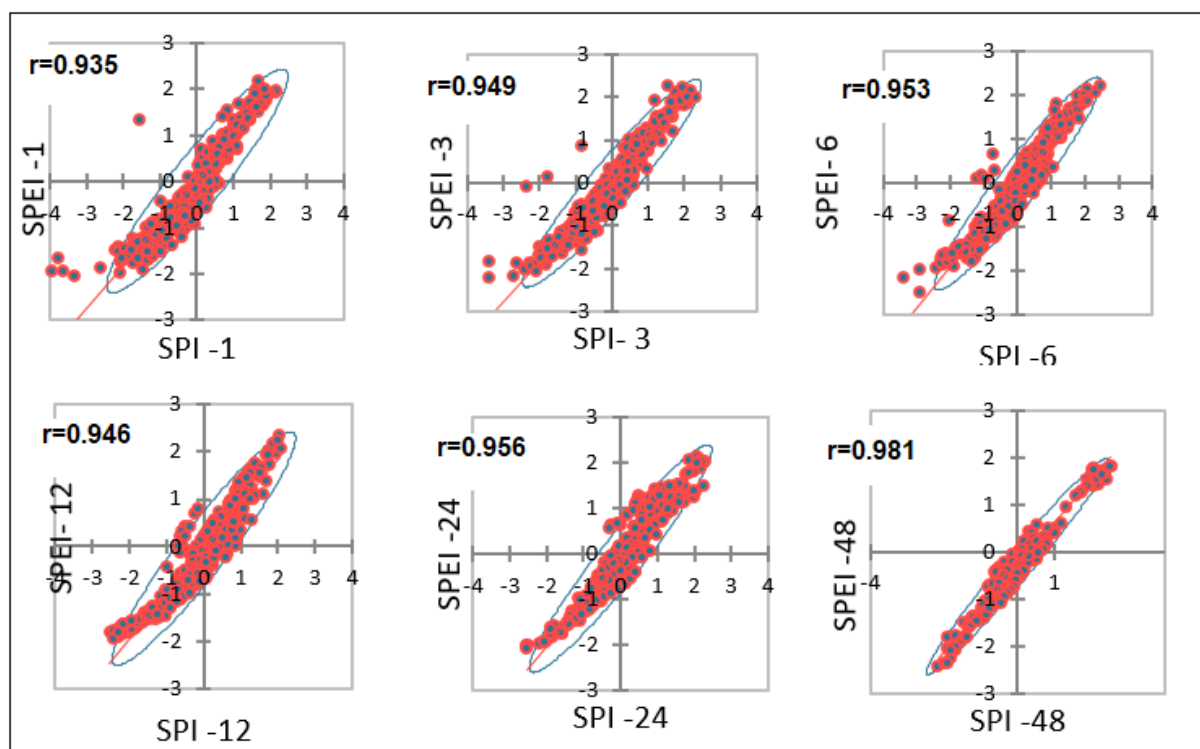

**Table S1 Data base of spatial distribution of SPI/SGI correlation over different time scales presented in Figure 7.**

| <b>Time scale<br/>(months)</b> | <b>P-18</b> | <b>P-9</b> | <b>P-58</b> | <b>P-23</b> | <b>P-6</b> | <b>P-17</b> |
|--------------------------------|-------------|------------|-------------|-------------|------------|-------------|
| <b>1</b>                       | 0.199       | 0.073      | 0.027       | 0.059       | 0.074      | 0.135       |
| <b>3</b>                       | 0.481       | 0.157      | 0.219       | 0.078       | 0.314      | 0.357       |
| <b>6</b>                       | 0.633       | 0.224      | 0.413       | 0.084       | 0.51       | 0.511       |
| <b>12</b>                      | 0.663       | 0.195      | 0.656       | 0.052       | 0.66       | 0.593       |
| <b>24</b>                      | 0.459       | -0.01      | 0.72        | 0.328       | 0.467      | 0.572       |
| <b>48</b>                      | 0.273       | -0.053     | 0.669       | 0.069       | 0.245      | 0.477       |

**Table S2 Data base of spatial distribution of SPI/SGI correlation over different time scales presented in Figure 9.**

| <b>Time scale<br/>(months)</b> | <b>P-18</b> | <b>P-9</b> | <b>P-58</b> | <b>P-23</b> | <b>P-6</b> | <b>P-17</b> |
|--------------------------------|-------------|------------|-------------|-------------|------------|-------------|
| <b>1</b>                       | 0.254       | 0.1        | 0.03        | 0.101       | 0.109      | 0.195       |
| <b>3</b>                       | 0.425       | 0.135      | 0.138       | 0.101       | 0.225      | 0.332       |
| <b>6</b>                       | 0.525       | 0.235      | 0.226       | 0.008       | 0.309      | 0.431       |
| <b>12</b>                      | 0.654       | 0.408      | 0.367       | 0.016       | 0.437      | 0.556       |
| <b>24</b>                      | 0.793       | 0.567      | 0.531       | 0.427       | 0.601      | 0.686       |
| <b>48</b>                      | 0.81        | 0.592      | 0.665       | 0.52        | 0.581      | 0.759       |
